# Supplementary material
Source: Springer Nature journal article supplement (https://www.springermedizin.de/resource/supplementary/13058_2011_2912_MOESM10_ESM.pdf/9702798)

A

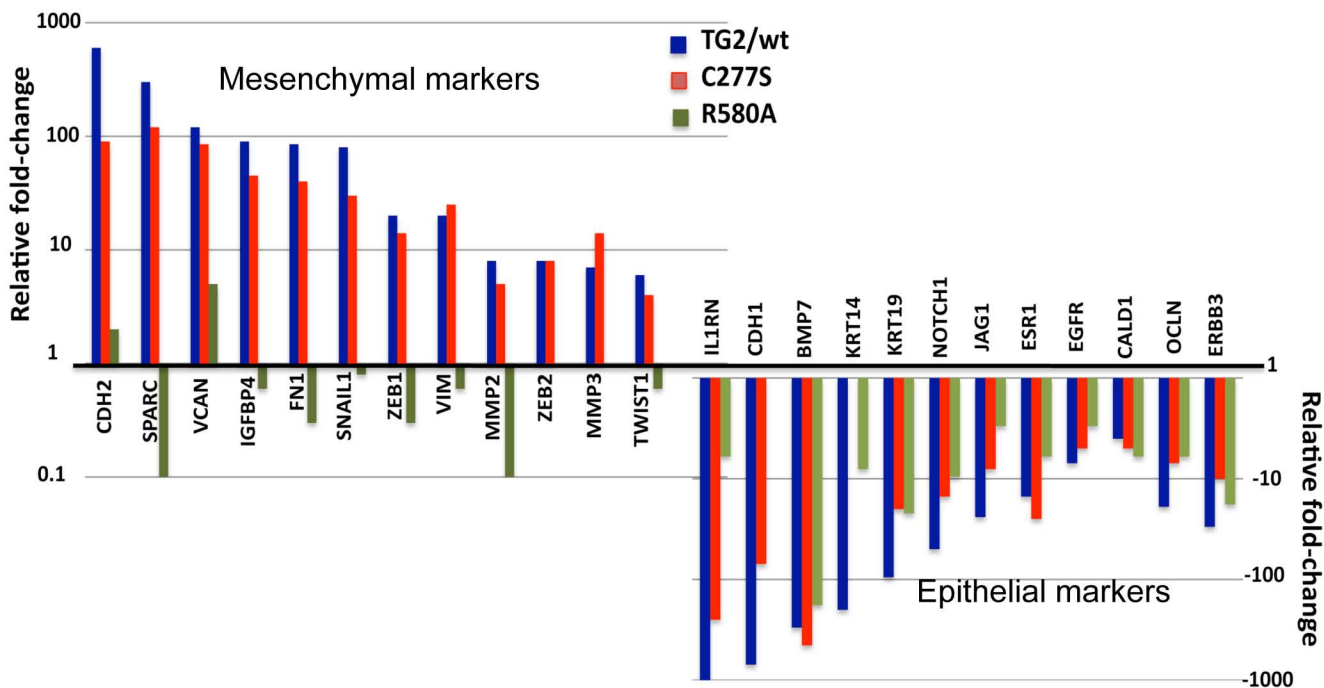

B

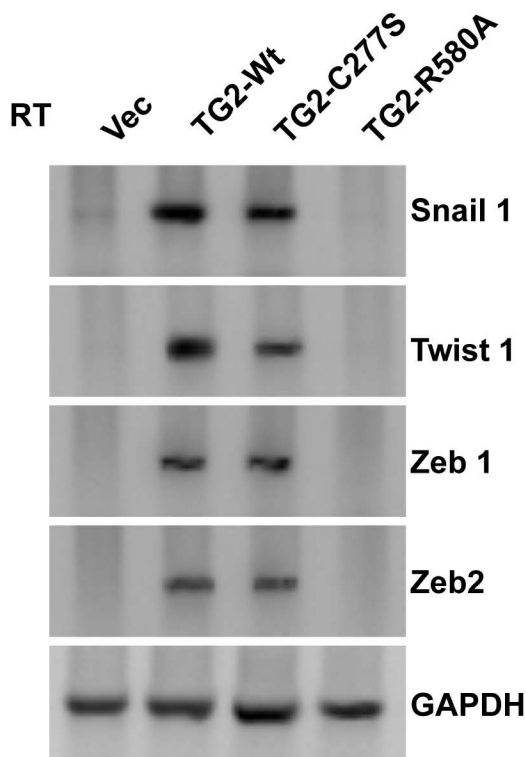

C

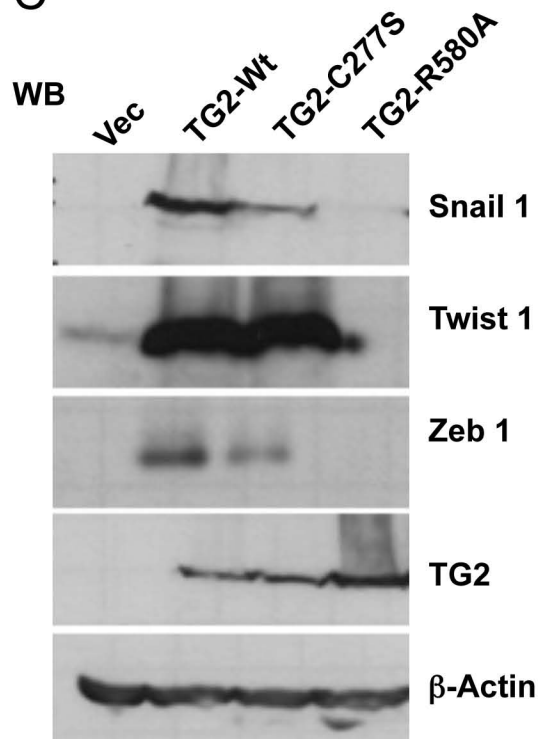

Supplement: MOESM10 [file 9702798]
